# Supplementary material for: Absolutely dating the European Neolithic through a rapid 14C excursion
Source: Research Square preprint supplement (doi:10.21203/rs.3.rs-3419721/v1), 2023-10-20
Supplement: Supplementary file 1 [file 22c42e8b0bc0717bd6267301.xlsx]

## Sheet: All_14C
Lab Code	Sample label	Ring on wood sample	Age_uncal (y BP)	±1s (y)	Age_corr(y BP)	±1s (y)	F14C	±1s	F14C_corr	±1s	BC year	∆14C (‰)	±1s (‰)	∆14C_corr (‰)	±1s (‰)	δ13C (‰)	±1s (‰)	Wood sample number (DNr)	Lab	size(µg C)	14C counts	12C HE (µA)	Run	Measurment batch	Location	comment	yr-to-yr diff. (Miyake ea 2012)	2x2 yr diff. (Szidat)	3x3 yr diff. (Buentgen ea 2018)
BE-18567.1.1	DISJ-26-10206-6	6	6232.28	26.0802	6201.38	26.2862	0.46032	0.00149449	0.462094	0.0015121	5289	104.834	3.58699	109.092	3.62926	-20.9891	1.5	10206	LARA	NA	NA	NA	1st	1	40°29'07.6"N 21°17'22.9"E
BE-18568.1.1	DISJ-30-10206-10	10	6254.11	25.9352	6223.21	26.1424	0.45907	0.00148214	0.460839	0.00149974	5285	101.302	3.55564	105.547	3.59786	-20.5171	1.5	10206	LARA	NA	NA	NA	1st	1	40°29'07.6"N 21°17'22.9"E
BE-18569.1.1	DISJ-34-10206-14	14	6299.49	26.4029	6268.59	26.6064	0.456484	0.00150037	0.458243	0.00151777	5281	94.5684	3.59763	98.7867	3.63934	-21.1727	1.5	10206	LARA	NA	NA	NA	1st	1	40°29'07.6"N 21°17'22.9"E
BE-18570.1.1	DISJ-38-10206-18	18	6298.28	26.4328	6267.39	26.6361	0.456553	0.0015023	0.458312	0.00151969	5277	94.2032	3.60051	98.42	3.64218	-21.6039	1.5	10206	LARA	NA	NA	NA	1st	1	40°29'07.6"N 21°17'22.9"E
BE-18571.1.1	DISJ-42-10206-22	22	6279.63	26.2598	6248.73	26.4645	0.457614	0.00149594	0.459378	0.0015134	5273	96.2162	3.58352	100.441	3.62537	-20.1571	1.5	10206	LARA	NA	NA	NA	1st	1	40°29'07.6"N 21°17'22.9"E
BE-18572.1.1	DISJ-46-10206-26	26	6336.41	26.3716	6305.51	26.5754	0.454391	0.00149172	0.456142	0.00150904	5269	87.9693	3.5717	92.1622	3.61317	-20.1283	1.5	10206	LARA	NA	NA	NA	1st	1	40°29'07.6"N 21°17'22.9"E
BE-18573.1.1	DISJ-50-10206-30	30	6319.9	26.2817	6289	26.4861	0.455326	0.00148969	0.45708	0.00150707	5265	89.6798	3.56512	93.8792	3.6067	-21.3277	1.5	10206	LARA	NA	NA	NA	1st	1	40°29'07.6"N 21°17'22.9"E
BE-18915.1.1	DISJ-51-10206-31	31	6337.04	25.0748	6306.14	25.289	0.454355	0.00141826	0.456106	0.00143589	5264	87.2255	3.39374	91.4155	3.43593	-21.4133	1.5	10206	LARA	NA	NA	NA	1st	2	40°29'07.6"N 21°17'22.9"E
BE-18916.1.1	DISJ-52-10206-32	32	6333.56	24.724	6302.66	24.9413	0.454552	0.00139903	0.456304	0.00141676	5263	87.5656	3.34732	91.7569	3.38975	-21.6557	1.5	10206	LARA	NA	NA	NA	1st	2	40°29'07.6"N 21°17'22.9"E
BE-18917.1.1	DISJ-53-10206-33	33	6353.92	24.7384	6323.02	24.9555	0.453402	0.00139629	0.455149	0.00141398	5262	84.6816	3.34038	88.8618	3.38268	-21.3433	1.5	10206	LARA	NA	NA	NA	1st	2	40°29'07.6"N 21°17'22.9"E
BE-18574.1.1	DISJ-54-10206-34	34	6311.67	26.0356	6280.77	26.242	0.455792	0.00147726	0.457549	0.00149471	5261	90.2687	3.53365	94.4705	3.57538	-19.2372	1.5	10206	LARA	NA	NA	NA	1st	1	40°29'07.6"N 21°17'22.9"E
BE-18918.1.1	DISJ-55-10206-35	35	6319.26	24.5911	6288.36	24.8095	0.455362	0.00139398	0.457117	0.00141178	5260	89.1075	3.33404	93.3047	3.37661	-19.6996	1.5	10206	LARA	NA	NA	NA	1st	2	40°29'07.6"N 21°17'22.9"E
BE-18919.1.1	DISJ-56-10206-36	36	6222.4	24.5005	6191.5	24.7197	0.460886	0.00140569	0.462662	0.00142374	5259	102.187	3.36165	106.434	3.4048	-20.9942	1.5	10206	LARA	NA	NA	NA	1st	2	40°29'07.6"N 21°17'22.9"E	Miyake event	13.1295	15.0486	15.4737
BE-18920.1.1	DISJ-57-10206-37	37	6209.27	26.9032	6178.38	27.103	0.46164	0.00154607	0.463419	0.00156356	5258	103.855	3.69691	108.109	3.73871	-20.8568	1.5	10206	LARA	NA	NA	NA	1st	2	40°29'07.6"N 21°17'22.9"E
BE-18575.1.1	DISJ-58-10206-38	38	6196.32	26.6284	6165.42	26.8302	0.462385	0.00153275	0.464167	0.00155032	5257	105.503	3.66461	109.763	3.70661	-21.7635	1.5	10206	LARA	NA	NA	NA	1st	1	40°29'07.6"N 21°17'22.9"E
BE-18921.1.1	DISJ-59-10206-39	39	6239.81	24.4719	6208.91	24.6914	0.459888	0.00140101	0.46166	0.00141903	5256	99.4009	3.34924	103.638	3.3923	-20.6019	1.5	10206	LARA	NA	NA	NA	1st	2	40°29'07.6"N 21°17'22.9"E
BE-18922.1.1	DISJ-60-10206-40	40	6221.68	24.2179	6190.78	24.4396	0.460927	0.0013896	0.462704	0.00140773	5255	101.752	3.32156	105.998	3.36489	-20.5586	1.5	10206	LARA	NA	NA	NA	1st	2	40°29'07.6"N 21°17'22.9"E
BE-18923.1.1	DISJ-61-10206-41	41	6228.17	24.5852	6197.28	24.8037	0.460555	0.00140954	0.46233	0.00142754	5254	100.728	3.36881	104.97	3.41184	-20.3574	1.5	10206	LARA	NA	NA	NA	1st	2	40°29'07.6"N 21°17'22.9"E
BE-18576.1.1	DISJ-62-10206-42	42	6240.18	26.0274	6209.29	26.2338	0.459867	0.00148999	0.461639	0.0015076	5253	98.9507	3.56066	103.186	3.60274	-20.5925	1.5	10206	LARA	NA	NA	NA	1st	1	40°29'07.6"N 21°17'22.9"E
BE-18924.1.1	DISJ-63-10206-43	43	6268.83	24.4823	6237.93	24.7017	0.45823	0.00139655	0.459996	0.0014145	5252	94.907	3.33696	99.1266	3.37984	-20.856	1.5	10206	LARA	NA	NA	NA	1st	2	40°29'07.6"N 21°17'22.9"E
BE-18925.1.1	DISJ-64-10206-44	44	6244.31	25.1131	6213.41	25.327	0.459631	0.00143692	0.461402	0.00145474	5251	98.1209	3.43299	102.353	3.47558	-20.4915	1.5	10206	LARA	NA	NA	NA	1st	2	40°29'07.6"N 21°17'22.9"E
BE-18926.1.1	DISJ-65-10206-45	45	6294.27	24.6943	6263.38	24.9118	0.456781	0.00140419	0.458541	0.00142202	5250	91.1798	3.3544	95.385	3.39699	-21.418	1.5	10206	LARA	NA	NA	NA	1st	2	40°29'07.6"N 21°17'22.9"E
BE-18577.1.1	DISJ-66-10206-46	46	6309.87	26.0157	6278.97	26.2223	0.455894	0.00147646	0.457651	0.00149392	5249	88.9313	3.52662	93.1278	3.56832	-20.302	1.5	10206	LARA	NA	NA	NA	1st	1	40°29'07.6"N 21°17'22.9"E
BE-18927.1.1	DISJ-67-10206-47	47	6283.45	24.51	6252.55	24.7291	0.457397	0.00139559	0.459159	0.0014135	5248	92.3871	3.33305	96.597	3.37581	-20.4061	1.5	10206	LARA	NA	NA	NA	1st	2	40°29'07.6"N 21°17'22.9"E
BE-18928.1.1	DISJ-68-10206-48	48	6296.06	24.3299	6265.17	24.5506	0.456679	0.00138316	0.458439	0.00140109	5247	90.541	3.30297	94.7438	3.34578	-21.1961	1.5	10206	LARA	NA	NA	NA	1st	2	40°29'07.6"N 21°17'22.9"E
BE-18929.1.1	DISJ-69-10206-49	49	6293.88	24.3434	6262.98	24.564	0.456803	0.0013843	0.458563	0.00140223	5246	90.7053	3.3053	94.9087	3.3481	-19.6916	1.5	10206	LARA	NA	NA	NA	1st	2	40°29'07.6"N 21°17'22.9"E
BE-18578.1.1	DISJ-70-10206-50	50	6323.86	26.6048	6292.96	26.8068	0.455101	0.00150727	0.456855	0.00152456	5245	86.511	3.59845	90.6982	3.63975	-21.6752	1.5	10206	LARA	NA	NA	NA	1st	1	40°29'07.6"N 21°17'22.9"E
BE-18579.1.1	DISJ-74-10206-54	54	6329.23	26.4783	6298.34	26.6812	0.454797	0.0014991	0.45655	0.00151641	5241	85.2591	3.57722	89.4416	3.61853	-20.2819	1.5	10206	LARA	NA	NA	NA	1st	1	40°29'07.6"N 21°17'22.9"E
BE-18580.1.1	DISJ-78-10206-58	58	6332.91	26.3364	6302.02	26.5405	0.454589	0.00149038	0.456341	0.00150772	5237	84.2375	3.5547	88.4159	3.59605	-21.0124	1.5	10206	LARA	NA	NA	NA	1st	1	40°29'07.6"N 21°17'22.9"E
BE-18581.1.1	DISJ-82-10206-62	62	6315.26	26.6229	6284.36	26.8247	0.455589	0.00150991	0.457345	0.00152722	5233	86.0973	3.59953	90.2829	3.6408	-21.708	1.5	10206	LARA	NA	NA	NA	1st	1	40°29'07.6"N 21°17'22.9"E
BE-18582.1.1	DISJ-86-10206-66	66	6321.07	26.1256	6290.17	26.3313	0.45526	0.00148064	0.457014	0.00149804	5229	84.7876	3.52804	88.9681	3.56952	-21.3166	1.5	10206	LARA	NA	NA	NA	1st	1	40°29'07.6"N 21°17'22.9"E
BE-18583.1.1	DISJ-90-10206-70	70	6312.66	26.8292	6281.76	27.0295	0.455736	0.0015221	0.457493	0.00153938	5225	85.3982	3.62509	89.5812	3.66623	-25.2417	1.5	10206	LARA	NA	NA	NA	1st	1	40°29'07.6"N 21°17'22.9"E
BE-18584.1.1	DISJ-94-10206-74	74	6335.98	26.1182	6305.08	26.324	0.454415	0.00147747	0.456166	0.00149485	5221	81.7276	3.51709	85.8964	3.55846	-21.1516	1.5	10206	LARA	NA	NA	NA	1st	1	40°29'07.6"N 21°17'22.9"E
BE-18585.1.1	DISJ-98-10206-78	78	6373.74	26.3631	6342.84	26.5669	0.452284	0.00148433	0.454027	0.00150157	5217	76.1341	3.53171	80.2813	3.57273	-21.8512	1.5	10206	LARA	NA	NA	NA	1st	1	40°29'07.6"N 21°17'22.9"E
BE-18586.1.1	DISJ-100-10206-80	80	6332.05	27.0199	6301.15	27.2188	0.454638	0.00152922	0.45639	0.00154642	5215	81.4725	3.63765	85.6403	3.67855	-23.8991	1.5	10206	LARA	NA	NA	NA	1st	1	40°29'07.6"N 21°17'22.9"E
BE-19721.1.1	DISJ-161-10070-31	31	6312.33	25.7381	6281.43	25.9469	0.455755	0.00146026	0.457512	0.00147778	5267	90.9718	3.49552	95.1762	3.53745	-19.8642	1.5	10070	LARA	NA	NA	NA	1st	3	40°29'07.6"N 21°17'22.9"E
BE-19722.1.1	DISJ-163-10070-33	33	6294.36	26.2903	6263.47	26.4947	0.456775	0.00149493	0.458536	0.00151236	5265	93.1492	3.57764	97.362	3.61935	-22.464	1.5	10070	LARA	NA	NA	NA	1st	3	40°29'07.6"N 21°17'22.9"E
BE-19723.1.1	DISJ-165-10070-35	35	6321.54	25.9646	6290.64	26.1715	0.455233	0.00147142	0.456987	0.00148886	5263	89.194	3.52053	93.3915	3.56227	-21.2283	1.5	10070	LARA	NA	NA	NA	1st	3	40°29'07.6"N 21°17'22.9"E
BE-19724.1.1	DISJ-167-10070-37	37	6321.13	26.344	6290.23	26.5479	0.455256	0.001493	0.45701	0.00151036	5261	88.9858	3.57129	93.1826	3.61282	-23.4305	1.5	10070	LARA	NA	NA	NA	1st	3	40°29'07.6"N 21°17'22.9"E
BE-19725.1.1	DISJ-168-10070-38	38	6308.5	26.1473	6277.6	26.3528	0.455972	0.00148418	0.45773	0.00150161	5260	90.5676	3.54978	94.7705	3.59147	-20.8151	1.5	10070	LARA	NA	NA	NA	1st	3	40°29'07.6"N 21°17'22.9"E
BE-19726.1.1	DISJ-169-10070-39	39	6226.34	27.9359	6195.45	28.1283	0.46066	0.00160201	0.462435	0.00161926	5259	101.645	3.83113	105.891	3.87239	-24.018	1.5	10070	LARA	NA	NA	NA	1st	3	40°29'07.6"N 21°17'22.9"E	Miyake event	11.1201	20.9097	17.434
BE-19727.1.1	DISJ-170-10070-40	40	6163.43	26.5096	6132.54	26.7124	0.464281	0.00153217	0.466071	0.00154984	5258	110.172	3.66367	114.451	3.70591	-22.4873	1.5	10070	LARA	NA	NA	NA	1st	3	40°29'07.6"N 21°17'22.9"E
BE-19728.1.1	DISJ-171-10070-41	41	6156.18	26.3971	6125.29	26.6007	0.464701	0.00152705	0.466492	0.00154475	5257	111.04	3.65097	115.322	3.69331	-22.0756	1.5	10070	LARA	NA	NA	NA	1st	3	40°29'07.6"N 21°17'22.9"E
BE-19729.1.1	DISJ-173-10070-43	43	6218.28	26.2129	6187.38	26.4179	0.461122	0.00150471	0.462899	0.00152232	5255	102.218	3.5967	106.466	3.6388	-21.9144	1.5	10070	LARA	NA	NA	NA	1st	3	40°29'07.6"N 21°17'22.9"E
BE-19730.1.1	DISJ-176-10070-46	46	6239.02	26.2273	6208.12	26.4322	0.459933	0.00150166	0.461706	0.00151922	5252	98.9767	3.5881	103.212	3.63007	-21.6551	1.5	10070	LARA	NA	NA	NA	1st	3	40°29'07.6"N 21°17'22.9"E
BE-19731.1.1	DISJ-179-10070-49	49	6266.13	26.2063	6235.23	26.4114	0.458384	0.0014954	0.46015	0.00151291	5249	94.8772	3.57185	99.0967	3.61367	-22.2939	1.5	10070	LARA	NA	NA	NA	1st	3	40°29'07.6"N 21°17'22.9"E
BE-21287.1.1	DISJ-202-10063-102	102	6305.48	25.2269	6299.33	18.5649	0.456144	0.00143248	0.456493	0.00105499	5263	91.3731	3.42735	92.2097	2.52419	-19.8299	1.5	10063	LARA	NA	NA	NA	1st	5	40°29'07.6"N 21°17'22.9"E
BE-21288.1.1	DISJ-203-10063-103	103	6312.34	24.2914	6305.69	18.6448	0.455754	0.00137818	0.456132	0.00105869	5262	90.3094	3.29705	91.2137	2.53273	-20.2251	1.5	10063	LARA	NA	NA	NA	1st	5	40°29'07.6"N 21°17'22.9"E
BE-21289.1.1	DISJ-204-10063-104	104	6306.84	36.2439	6313.37	18.8544	0.456067	0.00205772	0.455696	0.00106957	5261	90.925	4.92212	90.0383	2.55845	-20.3031	1.5	10063	LARA	NA	NA	NA	1st	5	40°29'07.6"N 21°17'22.9"E
BE-21290.1.1	DISJ-205-10063-105	105	6307.76	28.6257	6306.69	18.6857	0.456015	0.00162501	0.456075	0.00106088	5260	90.6684	3.88661	90.8134	2.53736	-19.8897	1.5	10063	LARA	NA	NA	NA	1st	5	40°29'07.6"N 21°17'22.9"E
BE-21291.1.1	DISJ-206-10063-106	106	6204.24	26.5001	6197.21	18.4896	0.461929	0.00152386	0.462333	0.00106415	5259	104.681	3.64424	105.647	2.54487	-19.2578	1.5	10063	LARA	NA	NA	NA	1st	5	40°29'07.6"N 21°17'22.9"E	Miyake event	14.8339	18.7845	6.80455
BE-21292.1.1	DISJ-207-10063-107	107	6175.91	24.9568	6170.15	18.6679	0.463561	0.00144018	0.463893	0.00107804	5258	108.449	3.44371	109.244	2.57777	-20.2042	1.5	10063	LARA	NA	NA	NA	1st	5	40°29'07.6"N 21°17'22.9"E
BE-21293.1.1	DISJ-208-10063-108	108	6178.07	20.3207	6169.67	18.5334	0.463436	0.00117233	0.463921	0.00107034	5257	108.017	2.8029	109.177	2.55905	-19.5043	1.5	10063	LARA	NA	NA	NA	1st	5	40°29'07.6"N 21°17'22.9"E
ETH-128722.1.1	DISJ-e-10611-14	14	6279.38	13.8847	NA	NA	0.457625	0.000790991	NA	NA	5264	95.0504	1.89276	NA	NA	-18.576	NA	10611	ETH	973	707998	21.7962		1	40°29'07.6"N 21°17'22.9"E
ETH-128723.1.1	DISJ-e-10611-15	15	6268.34	14.0372	NA	NA	0.458255	0.000800778	NA	NA	5263	96.4237	1.91595	NA	NA	-18.932	NA	10611	ETH	971	676460	20.8342		1	40°29'07.6"N 21°17'22.9"E
ETH-128724.1.1	DISJ-e-10611-16	16	6271.82	14.0726	NA	NA	0.458056	0.000802453	NA	NA	5262	95.8164	1.91972	NA	NA	-18.1971	NA	10611	ETH	970	669206	20.595		1	40°29'07.6"N 21°17'22.9"E
ETH-128725.1.1	DISJ-e-10611-17	17	6271.07	14.0678	NA	NA	0.458099	0.000802256	NA	NA	5261	95.7857	1.91902	NA	NA	-17.7799	NA	10611	ETH	982	669843	20.5942		1	40°29'07.6"N 21°17'22.9"E
ETH-128726.1.1	DISJ-e-10611-18	18	6299.28	13.9632	NA	NA	0.456493	0.000793499	NA	NA	5260	91.812	1.89784	NA	NA	-19.1504	NA	10611	ETH	961	692729	21.4137		1	40°29'07.6"N 21°17'22.9"E
ETH-128727.1.1	DISJ-e-10611-19	19	6155.66	13.9123	NA	NA	0.464728	0.000804868	NA	NA	5259	111.373	1.9248	NA	NA	-19.2835	NA	10611	ETH	980	697542	21.1932		1	40°29'07.6"N 21°17'22.9"E	Miyake event	19.5611	16.5953	14.2238
ETH-128728.1.1	DISJ-e-10611-20	20	6163.88	14.0844	NA	NA	0.464252	0.000813989	NA	NA	5258	110.103	1.94638	NA	NA	-18.611	NA	10611	ETH	968	663221	20.7633		1	40°29'07.6"N 21°17'22.9"E
ETH-128729.1.1	DISJ-e-10611-21	21	6158.69	14.1004	NA	NA	0.464552	0.000815442	NA	NA	5257	110.686	1.94962	NA	NA	-18.9187	NA	10611	ETH	962	660177	20.6693		1	40°29'07.6"N 21°17'22.9"E
ETH-128730.1.1	DISJ-e-10611-22	22	6163.34	14.067	NA	NA	0.464284	0.000813041	NA	NA	5256	109.909	1.94364	NA	NA	-18.3135	NA	10611	ETH	967	666343	20.8447		1	40°29'07.6"N 21°17'22.9"E
ETH-128731.1.1	DISJ-e-10611-23	23	6172.8	14.0385	NA	NA	0.463737	0.000810438	NA	NA	5255	108.469	1.93719	NA	NA	-19.9223	NA	10611	ETH	966	673190	21.1456		1	40°29'07.6"N 21°17'22.9"E
ETH-128732.1.1	DISJ-e-10611-24	24	6182.22	14.0553	NA	NA	0.463194	0.000810458	NA	NA	5254	107.035	1.937	NA	NA	-19.3647	NA	10611	ETH	977	669926	21.0462		1	40°29'07.6"N 21°17'22.9"E
ETH-128733.1.1	DISJ-e-10611-25	25	6201.14	14.1064	NA	NA	0.462104	0.000811486	NA	NA	5253	104.297	1.93922	NA	NA	-19.1863	NA	10611	ETH	965	660743	20.804		1	40°29'07.6"N 21°17'22.9"E
ETH-128734.1.1	DISJ-e-10611-26	26	6223.91	13.9894	NA	NA	0.460796	0.000802478	NA	NA	5252	101.038	1.91746	NA	NA	-19.3338	NA	10611	ETH	981	684515	20.98		1	40°29'07.6"N 21°17'22.9"E
ETH-128735.1.1	DISJ-e-10611-27	27	6251.59	14.0871	NA	NA	0.459211	0.000805307	NA	NA	5251	97.1186	1.92399	NA	NA	-17.8422	NA	10611	ETH	970	665431	20.4154		1	40°29'07.6"N 21°17'22.9"E
ETH-128736.1.1	DISJ-e-10611-28	28	6246.23	14.0437	NA	NA	0.459517	0.000803356	NA	NA	5250	97.7172	1.9191	NA	NA	-18.7033	NA	10611	ETH	965	674191	20.7004		1	40°29'07.6"N 21°17'22.9"E
ETH-128737.1.1	DISJ-e-10611-29	29	6264.77	14.0475	NA	NA	0.458458	0.000801727	NA	NA	5249	95.0551	1.91497	NA	NA	-18.3415	NA	10611	ETH	979	673910	20.7235		1	40°29'07.6"N 21°17'22.9"E
ETH-128738.1.1	DISJ-e-10611-30	30	6255.43	13.9788	NA	NA	0.458992	0.00079873	NA	NA	5248	96.1966	1.90758	NA	NA	-19.5207	NA	10611	ETH	976	688027	21.1742		1	40°29'07.6"N 21°17'22.9"E
ETH-128739.1.1	DISJ-e-10611-31	31	6270.32	14.0707	NA	NA	0.458142	0.000802492	NA	NA	5247	94.0339	1.91634	NA	NA	-17.5656	NA	10611	ETH	966	669134	20.5625		1	40°29'07.6"N 21°17'22.9"E
ETH-128740.1.1	DISJ-e-10611-32	32	6264.03	14.0662	NA	NA	0.4585	0.000802864	NA	NA	5246	94.7585	1.91699	NA	NA	-18.5865	NA	10611	ETH	979	670398	20.6269		1	40°29'07.6"N 21°17'22.9"E
ETH-128741.1.1	DISJ-e-10611-33	33	6247.58	13.9313	NA	NA	0.45944	0.000796795	NA	NA	5245	96.8699	1.90227	NA	NA	-19.0322	NA	10611	ETH	971	697149	21.4077		1	40°29'07.6"N 21°17'22.9"E
BE-19688.1.1	DISJ-107-10611-12	12	6314.98	25.707	6284.08	25.916	0.455605	0.00145802	0.457361	0.00147553	5266	90.4795	3.48973	94.6821	3.53166	-18.0846	1.5	10611	LARA	NA	NA	NA		3	40°29'07.6"N 21°17'22.9"E
BE-19689.1.1	DISJ-109-10611-14	14	6311.8	26.2523	6280.9	26.457	0.455785	0.00148953	0.457542	0.00150693	5264	90.6476	3.5643	94.8507	3.60593	-19.4422	1.5	10611	LARA	NA	NA	NA	1st	3	40°29'07.6"N 21°17'22.9"E
BE-19690.1.1	DISJ-110-10611-15	15	6296.59	26.3736	6265.7	26.5773	0.456649	0.00149925	0.458409	0.00151665	5263	92.5815	3.58711	96.7921	3.62876	-21.0339	1.5	10611	LARA	NA	NA	NA	1st	3	40°29'07.6"N 21°17'22.9"E
BE-19691.1.1	DISJ-111-10611-16	16	6337.25	27.8264	6306.35	28.0196	0.454343	0.00157385	0.456094	0.00159088	5262	86.934	3.76515	91.1229	3.8059	-20.2821	1.5	10611	LARA	NA	NA	NA	1st	4	40°29'07.6"N 21°17'22.9"E
BE-19692.1.1	DISJ-112-10611-17	17	6317.73	28.2999	6286.84	28.4899	0.455449	0.00160452	0.457204	0.00162152	5261	89.4464	3.83807	93.6449	3.87873	-21.1582	1.5	10611	LARA	NA	NA	NA	1st	4	40°29'07.6"N 21°17'22.9"E
BE-19693.1.1	DISJ-113-10611-18	18	6361.2	27.8342	6330.3	28.0273	0.452991	0.0015696	0.454736	0.00158659	5260	83.436	3.75408	87.6114	3.7947	-20.3711	1.5	10611	LARA	NA	NA	NA	1st	4	40°29'07.6"N 21°17'22.9"E
BE-19694.1.1	DISJ-114-10611-19	19	6237.48	27.7101	6206.59	27.9041	0.460021	0.00158686	0.461794	0.00160413	5259	100.118	3.79489	104.358	3.83619	-19.8647	1.5	10611	LARA	NA	NA	NA	1st	4	40°29'07.6"N 21°17'22.9"E	Miyake event	16.7467	20.4366	15.039
BE-19695.1.1	DISJ-115-10611-20	20	6194.25	28.1602	6163.35	28.3512	0.462504	0.00162134	0.464286	0.00163862	5258	105.921	3.87688	110.183	3.91821	-20.5958	1.5	10611	LARA	NA	NA	NA	1st	4	40°29'07.6"N 21°17'22.9"E
BE-19696.1.1	DISJ-116-10611-21	21	6180.53	28.2508	6149.64	28.4411	0.463294	0.00162933	0.46508	0.00164663	5257	107.677	3.89553	111.946	3.93688	-20.9262	1.5	10611	LARA	NA	NA	NA	1st	4	40°29'07.6"N 21°17'22.9"E
BE-19697.1.1	DISJ-117-10611-22	22	6233.19	29.002	6202.29	29.1875	0.460267	0.00166173	0.462041	0.0016788	5256	100.307	3.97251	104.548	4.01331	-20.5634	1.5	10611	LARA	NA	NA	NA	1st	4	40°29'07.6"N 21°17'22.9"E
BE-19698.1.1	DISJ-118-10611-23	23	6198.99	28.7403	6168.09	28.9274	0.462231	0.00165376	0.464012	0.00167094	5255	104.868	3.95297	109.126	3.99404	-19.8976	1.5	10611	LARA	NA	NA	NA	1st	4	40°29'07.6"N 21°17'22.9"E
BE-19699.1.1	DISJ-119-10611-24	24	6224.29	29.018	6193.39	29.2033	0.460778	0.00166449	0.462553	0.00168158	5254	101.261	3.97814	105.505	4.01897	-20.563	1.5	10611	LARA	NA	NA	NA	1st	4	40°29'07.6"N 21°17'22.9"E
BE-19700.1.1	DISJ-120-10611-25	25	6250.27	28.7872	6219.37	28.974	0.45929	0.00164592	0.46106	0.00166299	5253	97.5721	3.93328	101.802	3.97406	-20.1661	1.5	10611	LARA	NA	NA	NA	1st	4	40°29'07.6"N 21°17'22.9"E
BE-19701.1.1	DISJ-121-10611-26	26	6250.82	29.3363	6219.92	29.5196	0.459258	0.0016772	0.461028	0.00169418	5252	97.364	4.00755	101.593	4.04813	-21.3814	1.5	10611	LARA	NA	NA	NA	1st	4	40°29'07.6"N 21°17'22.9"E
BE-19702.1.1	DISJ-122-10611-27	27	6277.5	29.1071	6246.61	29.2919	0.457735	0.00165858	0.459499	0.00167554	5251	93.5924	3.96257	97.807	4.00309	-20.15	1.5	10611	LARA	NA	NA	NA	1st	4	40°29'07.6"N 21°17'22.9"E
BE-19703.1.1	DISJ-123-10611-28	28	6281.67	29.0318	6250.77	29.217	0.457498	0.00165342	0.459261	0.00167039	5250	92.8929	3.94978	97.1047	3.9903	-19.7891	1.5	10611	LARA	NA	NA	NA	1st	4	40°29'07.6"N 21°17'22.9"E
BE-19704.1.1	DISJ-124-10611-29	29	6281.56	34.1402	6250.66	34.2979	0.457504	0.00194439	0.459267	0.0019609	5249	92.7757	4.6443	96.9871	4.68372	-22.3925	1.5	10611	LARA	NA	NA	NA	1st	4	40°29'07.6"N 21°17'22.9"E
BE-19705.1.1	DISJ-125-10611-30	30	6288.33	29.0386	6257.43	29.2237	0.457119	0.00165244	0.45888	0.00166939	5248	91.7231	3.94648	95.9304	3.98695	-19.3885	1.5	10611	LARA	NA	NA	NA	1st	4	40°29'07.6"N 21°17'22.9"E
BE-19706.1.1	DISJ-126-10611-31	31	6261.79	29.2484	6230.89	29.4322	0.458632	0.00166989	0.460399	0.00168686	5247	95.2044	3.98767	99.4252	4.0282	-19.6721	1.5	10611	LARA	NA	NA	NA	1st	4	40°29'07.6"N 21°17'22.9"E
BE-19707.1.1	DISJ-127-10611-32	32	6324.57	29.2515	6293.67	29.4354	0.455061	0.00165707	0.456815	0.00167391	5246	86.5462	3.95657	90.7336	3.99678	-21.0562	1.5	10611	LARA	NA	NA	NA	1st	4	40°29'07.6"N 21°17'22.9"E
BE-19708.1.1	DISJ-128-10611-33	33	6273.63	29.2049	6242.73	29.3891	0.457956	0.00166495	0.459721	0.00168191	5245	93.3268	3.97492	97.5403	4.0154	-19.93	1.5	10611	LARA	NA	NA	NA	1st	4	40°29'07.6"N 21°17'22.9"E
BE-19710.1.1	DISJ-130-10611-35	35	6297.1	29.3045	6266.2	29.488	0.45662	0.00166576	0.458379	0.00168265	5243	89.8724	3.97587	94.0726	4.01619	-20.032	1.5	10611	LARA	NA	NA	NA	1st	4	40°29'07.6"N 21°17'22.9"E
BE-19711.1.1	DISJ-132-10611-37	37	6307.14	30.9634	6276.24	31.1372	0.456049	0.00175786	0.457807	0.00177453	5241	88.2479	4.19468	92.4418	4.23448	-21.9059	1.5	10611	LARA	NA	NA	NA	1st	4	40°29'07.6"N 21°17'22.9"E
BE-19712.1.1	DISJ-134-10611-39	39	6321.2	29.2094	6290.3	29.3935	0.455252	0.00165538	0.457006	0.00167223	5239	86.0819	3.94919	90.2675	3.98939	-21.039	1.5	10611	LARA	NA	NA	NA	1st	4	40°29'07.6"N 21°17'22.9"E
BE-19713.1.1	DISJ-136-10611-41	41	6265.61	27.642	6234.71	27.8365	0.458414	0.00157742	0.46018	0.00159464	5237	93.36	3.76231	97.5736	3.80338	-20.4541	1.5	10611	LARA	NA	NA	NA	1st	4	40°29'07.6"N 21°17'22.9"E
BE-19714.1.1	DISJ-138-10611-43	43	6319.11	27.9042	6288.21	28.0969	0.455371	0.00158182	0.457126	0.00159888	5235	85.8401	3.77188	90.0247	3.81256	-20.9367	1.5	10611	LARA	NA	NA	NA	1st	4	40°29'07.6"N 21°17'22.9"E
BE-19715.1.1	DISJ-140-10611-45	45	6314.89	28.2629	6283.99	28.4532	0.45561	0.001603	0.457366	0.00162	5233	86.1476	3.82145	90.3335	3.862	-21.2113	1.5	10611	LARA	NA	NA	NA	1st	4	40°29'07.6"N 21°17'22.9"E
BE-19716.1.1	DISJ-142-10611-47	47	6304.01	34.9825	6273.11	35.1363	0.456227	0.0019868	0.457985	0.00200323	5231	87.356	4.73526	91.5465	4.77442	-21.6542	1.5	10611	LARA	NA	NA	NA	1st	4	40°29'07.6"N 21°17'22.9"E
BE-19717.1.1	DISJ-144-10611-49	49	6344.15	28.4093	6313.25	28.5986	0.453953	0.00160544	0.455703	0.00162236	5229	81.6743	3.82542	85.8429	3.86575	-20.2593	1.5	10611	LARA	NA	NA	NA	1st	4	40°29'07.6"N 21°17'22.9"E
BE-19718.1.1	DISJ-146-10611-51	51	6342.95	28.9812	6312.05	29.1667	0.454021	0.001638	0.455771	0.00165484	5227	81.5752	3.90207	85.7434	3.94218	-21.3895	1.5	10611	LARA	NA	NA	NA	1st	4	40°29'07.6"N 21°17'22.9"E
BE-19719.1.1	DISJ-148-10611-53	53	6290.19	29.1643	6259.29	29.3487	0.457013	0.00165921	0.458774	0.00167614	5225	88.4384	3.95164	92.6331	3.99195	-22.7975	1.5	10611	LARA	NA	NA	NA	1st	4	40°29'07.6"N 21°17'22.9"E
BE-19720.1.1	DISJ-150-10611-55	55	6311.96	29.0024	6281.06	29.1878	0.455776	0.00164554	0.457532	0.00166244	5223	85.2299	3.91812	89.4122	3.95837	-22.4797	1.5	10611	LARA	NA	NA	NA	1st	4	40°29'07.6"N 21°17'22.9"E
BE-21277.1.1	DISJ-2250-10611-15	15	6289.41	25.0936	6282.1	18.7581	0.457057	0.00142776	0.457474	0.00106826	5263	93.559	3.41608	94.5553	2.55592	-19.5139	1.5	10611	LARA	NA	NA	NA	2nd	5	40°29'07.6"N 21°17'22.9"E
BE-21278.1.1	DISJ-2251-10611-16	16	6302.46	26.5707	6295.82	18.5529	0.456316	0.00150935	0.456693	0.00105477	5262	91.6523	3.61085	92.555	2.52335	-19.1983	1.5	10611	LARA	NA	NA	NA	2nd	5	40°29'07.6"N 21°17'22.9"E
BE-21279.1.1	DISJ-2252-10611-17	17	6327.02	20.1853	6318.81	18.7213	0.454922	0.00114313	0.455388	0.0010613	5261	88.1875	2.7344	89.3007	2.53867	-19.0119	1.5	10611	LARA	NA	NA	NA	2nd	5	40°29'07.6"N 21°17'22.9"E
BE-21280.1.1	DISJ-2253-10611-18	18	6322.47	22.802	6315.63	18.6848	0.45518	0.00129205	0.455568	0.00105965	5260	88.6732	3.09025	89.6004	2.53442	-19.08	1.5	10611	LARA	NA	NA	NA	2nd	5	40°29'07.6"N 21°17'22.9"E
BE-21281.1.1	DISJ-2254-10611-19	19	6177.23	25.3046	6171.17	18.5444	0.463485	0.00146002	0.463835	0.00107078	5259	108.401	3.49156	109.238	2.56071	-19.6316	1.5	10611	LARA	NA	NA	NA	2nd	5	40°29'07.6"N 21°17'22.9"E	Miyake event	19.6377	18.9685	15.2268
BE-21282.1.1	DISJ-2255-10611-20	20	6173.12	22.5052	6165.05	18.7582	0.463722	0.00129916	0.464188	0.00108395	5258	108.834	3.1065	109.949	2.59189	-20.1029	1.5	10611	LARA	NA	NA	NA	2nd	5	40°29'07.6"N 21°17'22.9"E
BE-21283.1.1	DISJ-2256-10611-21	21	6191.49	25.4263	6186.25	18.5974	0.462663	0.00146444	0.462965	0.00107182	5257	106.168	3.50128	106.889	2.56259	-19.8179	1.5	10611	LARA	NA	NA	NA	2nd	5	40°29'07.6"N 21°17'22.9"E
BE-21284.1.1	DISJ-2257-10611-22	22	6203.5	25.6449	6197.16	18.6	0.461972	0.00147482	0.462336	0.00107051	5256	104.382	3.52568	105.253	2.55915	-18.7421	1.5	10611	LARA	NA	NA	NA	2nd	5	40°29'07.6"N 21°17'22.9"E
BE-21285.1.1	DISJ-2258-10611-23	23	6198.25	23.4301	6191.71	18.6031	0.462274	0.00134833	0.46265	0.00107142	5255	104.97	3.2229	105.87	2.56102	-19.6798	1.5	10611	LARA	NA	NA	NA	2nd	5	40°29'07.6"N 21°17'22.9"E
BE-21286.1.1	DISJ-2259-10611-24	24	6201.68	26.0628	6194.48	18.963	0.462076	0.00149919	0.462491	0.00109177	5254	104.365	3.58308	105.355	2.60934	-20.1604	1.5	10611	LARA	NA	NA	NA	2nd	5	40°29'07.6"N 21°17'22.9"E

## Sheet: Avg_10611LARA
Lab Code	Sample label	BC year	∆14C_corr (‰)	±1s (‰)	Wood sample	Lab	Run	Measurement batch		Lab Code	Sample label	BC year	∆14C_corr (‰)	±1s (‰)	Wood sample	Lab	Run	Measurement batch		Wood sample	BC year	Run	10611avg ∆14C (‰)	10611avg -±1s (‰)	comment	yr-to-yr diff. (Miyake ea 2012)	2x2 yr diff. (Szidat)	3x3 yr diff. (Buentgen ea 2018)
BE-19688.1.1	DISJ-107-10611-12	5266	94.6821	3.53166	10611	LARA	1st	3												10611	5266	average	94.6821	3.53166
BE-19689.1.1	DISJ-109-10611-14	5264	94.8507	3.60593	10611	LARA	1st	3												10611	5264	average	94.8507	3.60593
BE-19690.1.1	DISJ-110-10611-15	5263	96.7921	3.62876	10611	LARA	1st	3		BE-21277.1.1	DISJ-2250-10611-15	5263	94.5553	2.55592	10611	LARA	2nd	5		10611	5263	average	95.6737	2.08961
BE-19691.1.1	DISJ-111-10611-16	5262	91.1229	3.8059	10611	LARA	1st	4		BE-21278.1.1	DISJ-2251-10611-16	5262	92.555	2.52335	10611	LARA	2nd	5		10611	5262	average	91.839	2.10309
BE-19692.1.1	DISJ-112-10611-17	5261	93.6449	3.87873	10611	LARA	1st	4		BE-21279.1.1	DISJ-2252-10611-17	5261	89.3007	2.53867	10611	LARA	2nd	5		10611	5261	average	91.4728	2.12414
BE-19693.1.1	DISJ-113-10611-18	5260	87.6114	3.7947	10611	LARA	1st	4		BE-21280.1.1	DISJ-2253-10611-18	5260	89.6004	2.53442	10611	LARA	2nd	5		10611	5260	average	88.6059	2.10758
BE-19694.1.1	DISJ-114-10611-19	5259	104.358	3.83619	10611	LARA	1st	4		BE-21281.1.1	DISJ-2254-10611-19	5259	109.238	2.56071	10611	LARA	2nd	5		10611	5259	average	106.798	2.12981	Miyake event	18.1922	19.7025	15.1329
BE-19695.1.1	DISJ-115-10611-20	5258	110.183	3.91821	10611	LARA	1st	4		BE-21282.1.1	DISJ-2255-10611-20	5258	109.949	2.59189	10611	LARA	2nd	5		10611	5258	average	110.066	2.16172
BE-19696.1.1	DISJ-116-10611-21	5257	111.946	3.93688	10611	LARA	1st	4		BE-21283.1.1	DISJ-2256-10611-21	5257	106.889	2.56259	10611	LARA	2nd	5		10611	5257	average	109.418	2.14769
BE-19697.1.1	DISJ-117-10611-22	5256	104.548	4.01331	10611	LARA	1st	4		BE-21284.1.1	DISJ-2257-10611-22	5256	105.253	2.55915	10611	LARA	2nd	5		10611	5256	average	104.901	2.15779
BE-19698.1.1	DISJ-118-10611-23	5255	109.126	3.99404	10611	LARA	1st	4		BE-21285.1.1	DISJ-2258-10611-23	5255	105.87	2.56102	10611	LARA	2nd	5		10611	5255	average	107.498	2.15589
BE-19699.1.1	DISJ-119-10611-24	5254	105.505	4.01897	10611	LARA	1st	4		BE-21286.1.1	DISJ-2259-10611-24	5254	105.355	2.60934	10611	LARA	2nd	5		10611	5254	average	105.43	2.18853
BE-19700.1.1	DISJ-120-10611-25	5253	101.802	3.97406	10611	LARA	1st	4												10611	5253	average	101.802	3.97406
BE-19701.1.1	DISJ-121-10611-26	5252	101.593	4.04813	10611	LARA	1st	4												10611	5252	average	101.593	4.04813
BE-19702.1.1	DISJ-122-10611-27	5251	97.807	4.00309	10611	LARA	1st	4												10611	5251	average	97.807	4.00309
BE-19703.1.1	DISJ-123-10611-28	5250	97.1047	3.9903	10611	LARA	1st	4												10611	5250	average	97.1047	3.9903
BE-19704.1.1	DISJ-124-10611-29	5249	96.9871	4.68372	10611	LARA	1st	4												10611	5249	average	96.9871	4.68372
BE-19705.1.1	DISJ-125-10611-30	5248	95.9304	3.98695	10611	LARA	1st	4												10611	5248	average	95.9304	3.98695
BE-19706.1.1	DISJ-126-10611-31	5247	99.4252	4.0282	10611	LARA	1st	4												10611	5247	average	99.4252	4.0282
BE-19707.1.1	DISJ-127-10611-32	5246	90.7336	3.99678	10611	LARA	1st	4												10611	5246	average	90.7336	3.99678
BE-19708.1.1	DISJ-128-10611-33	5245	97.5403	4.0154	10611	LARA	1st	4												10611	5245	average	97.5403	4.0154
BE-19710.1.1	DISJ-130-10611-35	5243	94.0726	4.01619	10611	LARA	1st	4												10611	5243	average	94.0726	4.01619
BE-19711.1.1	DISJ-132-10611-37	5241	92.4418	4.23448	10611	LARA	1st	4												10611	5241	average	92.4418	4.23448
BE-19712.1.1	DISJ-134-10611-39	5239	90.2675	3.98939	10611	LARA	1st	4												10611	5239	average	90.2675	3.98939
BE-19713.1.1	DISJ-136-10611-41	5237	97.5736	3.80338	10611	LARA	1st	4												10611	5237	average	97.5736	3.80338
BE-19714.1.1	DISJ-138-10611-43	5235	90.0247	3.81256	10611	LARA	1st	4												10611	5235	average	90.0247	3.81256
BE-19715.1.1	DISJ-140-10611-45	5233	90.3335	3.862	10611	LARA	1st	4												10611	5233	average	90.3335	3.862
BE-19716.1.1	DISJ-142-10611-47	5231	91.5465	4.77442	10611	LARA	1st	4												10611	5231	average	91.5465	4.77442
BE-19717.1.1	DISJ-144-10611-49	5229	85.8429	3.86575	10611	LARA	1st	4												10611	5229	average	85.8429	3.86575
BE-19718.1.1	DISJ-146-10611-51	5227	85.7434	3.94218	10611	LARA	1st	4												10611	5227	average	85.7434	3.94218
BE-19719.1.1	DISJ-148-10611-53	5225	92.6331	3.99195	10611	LARA	1st	4												10611	5225	average	92.6331	3.99195
BE-19720.1.1	DISJ-150-10611-55	5223	89.4122	3.95837	10611	LARA	1st	4												10611	5223	average	89.4122	3.95837
