# Supplementary material for: Absolutely dating the European Neolithic through a rapid 14C excursion
Source: Research Square preprint supplement (doi:10.21203/rs.3.rs-3419721/v1), 2023-10-20
Supplement: Supplementary file 1 [file 6073f1ee2c85a331aa85dfc6.pdf]

## Supplementary Material

for “Absolutely dating the European Neolithic through a rapid 14C excursion”

by Maczkowski, Francuz, Pearson, Giagkoulis, Bolliger, Szidat, Wacker, Kotsakis & Hafner, 2024

### S1 – Dispilio oak chronology wiggle-matching OxCal CQL code and results

Options()

{

Resolution=1;

};

Plot()

{

D\_Sequence("Disp-6001 QUSP")

{

R\_Date("BE-12206.1.1 R.3-12", 6491, 24);

Gap(1);

R\_Date("BE-12197.1.1 R.6-10", 6444, 23);

Gap(4);

R\_Date("BE-12220.1.2 R.10-14", 6484, 28);

Gap(31);

R\_Date("BE-12222.1.1 R.41-45", 6448, 23);

Gap(9);

R\_Date("BE-12204.1.1 R.51-54", 6415, 24);

Gap(16);

R\_Date("BE-12215.1.1 R.67-70", 6398, 23);

Gap(1);

R\_Date("BE-12207.1.1 R.65-73", 6406, 24);

Gap(14);

```

R_Date("BE-12214.1.1 R.80-86", 6397, 23);
Gap(26);
R_Date("BE-12205.1.1 R.104-114", 6359, 24);
Gap(0);
R_Date("BE-12216.1.1 R.106-112", 6311, 24);
Gap(5);
R_Date("BE-12223.1.1 R.110-120", 6316, 23);
Gap(1);
Date("modelled end-date Dispilio oak chrono");
};
};

```

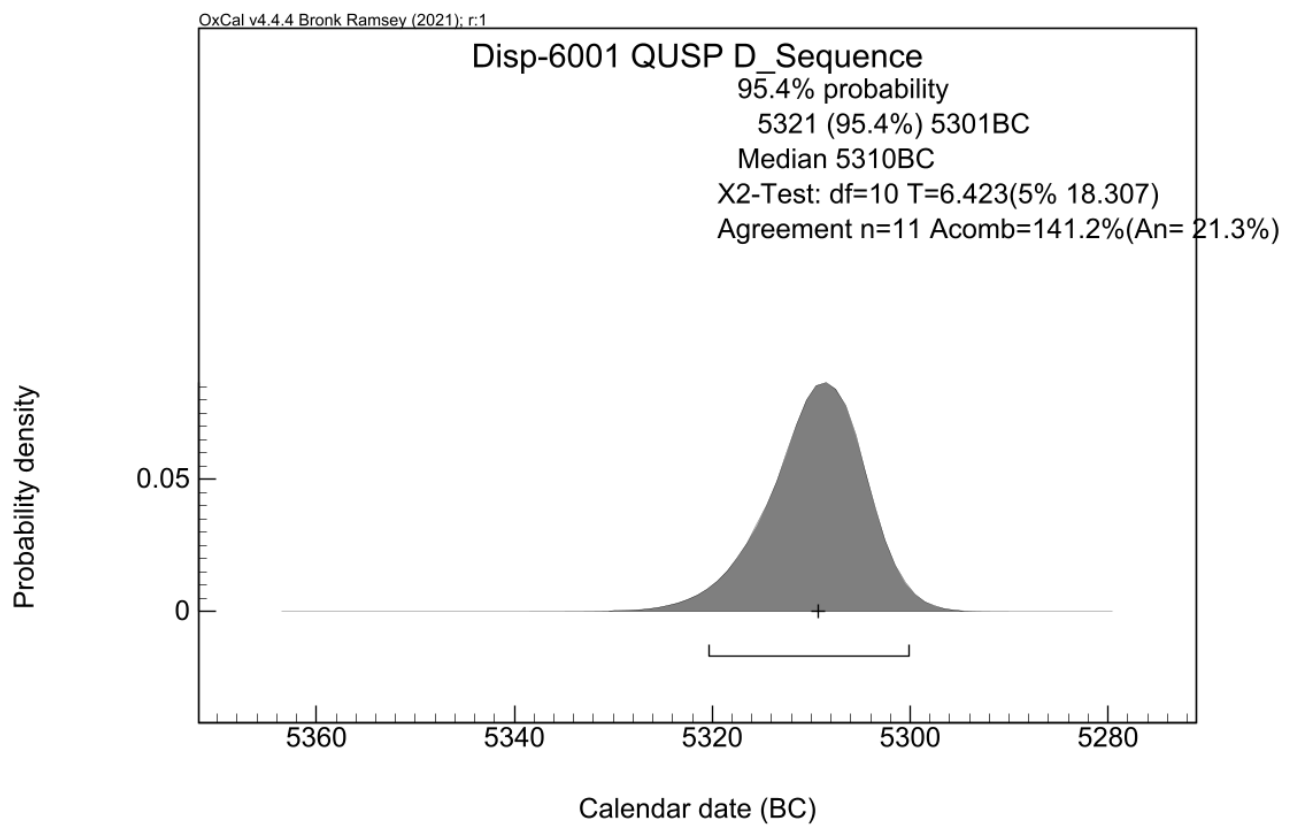

**Figure S1.1** Dispilio oak chronology modelled end-date through wiggle-matching in OxCal 4.4 <sup>1,2</sup>

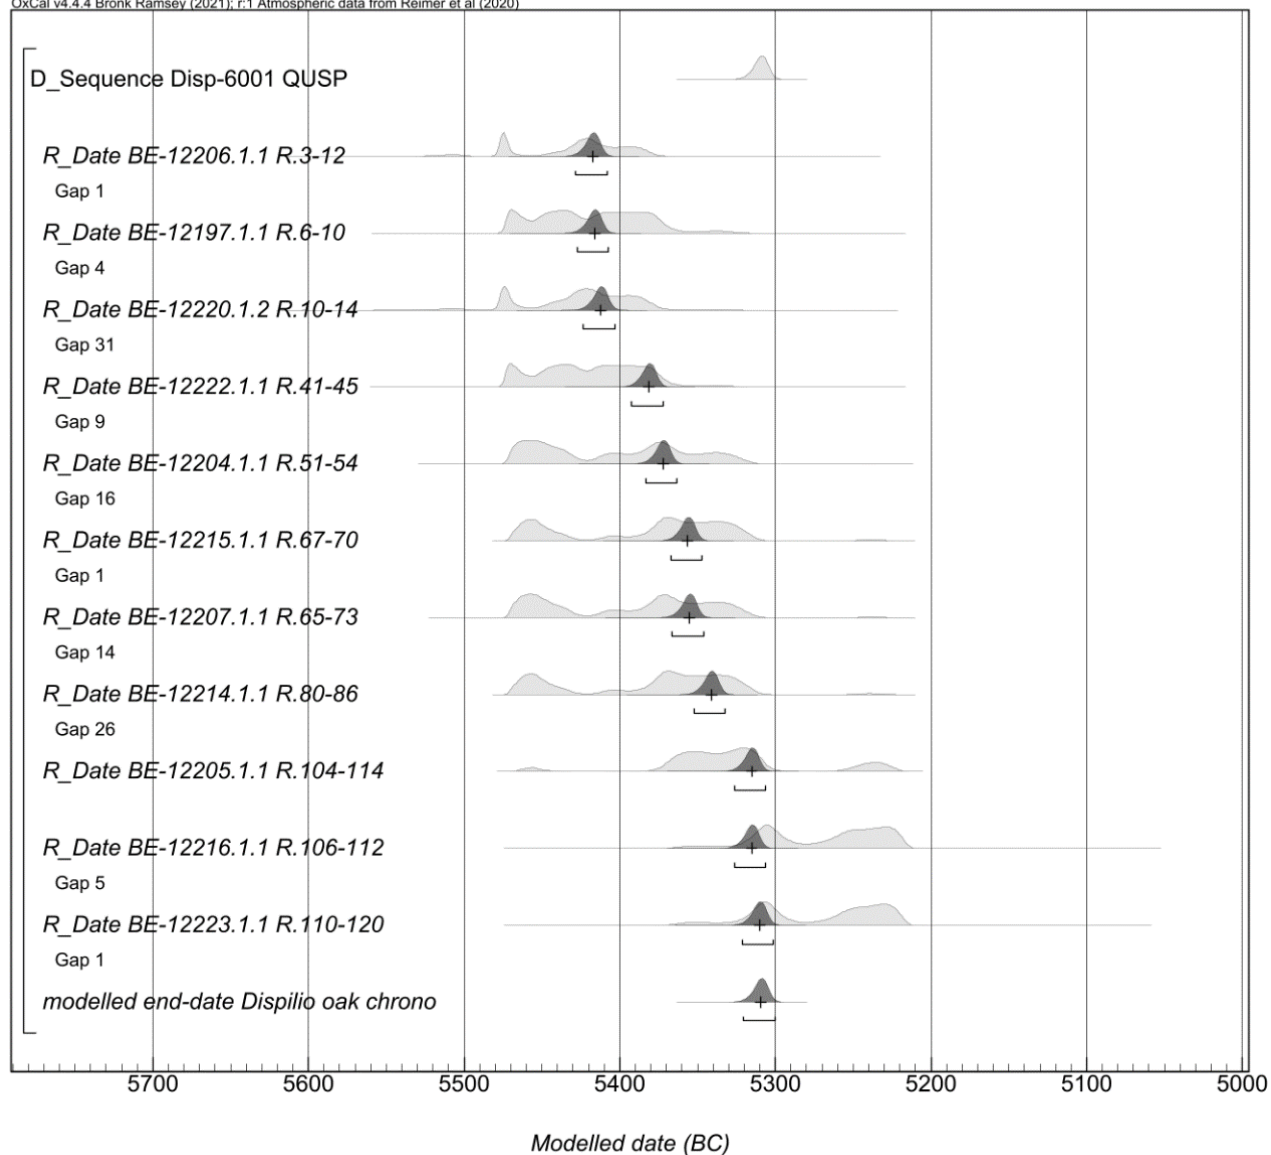

**Figure S1.2** Dispilio oak chronology wiggle-matching, same as Fig. S1.1, but including all the 14C dates; OxCal 4.4 <sup>1,2</sup>

## S2 – Supplementary figures

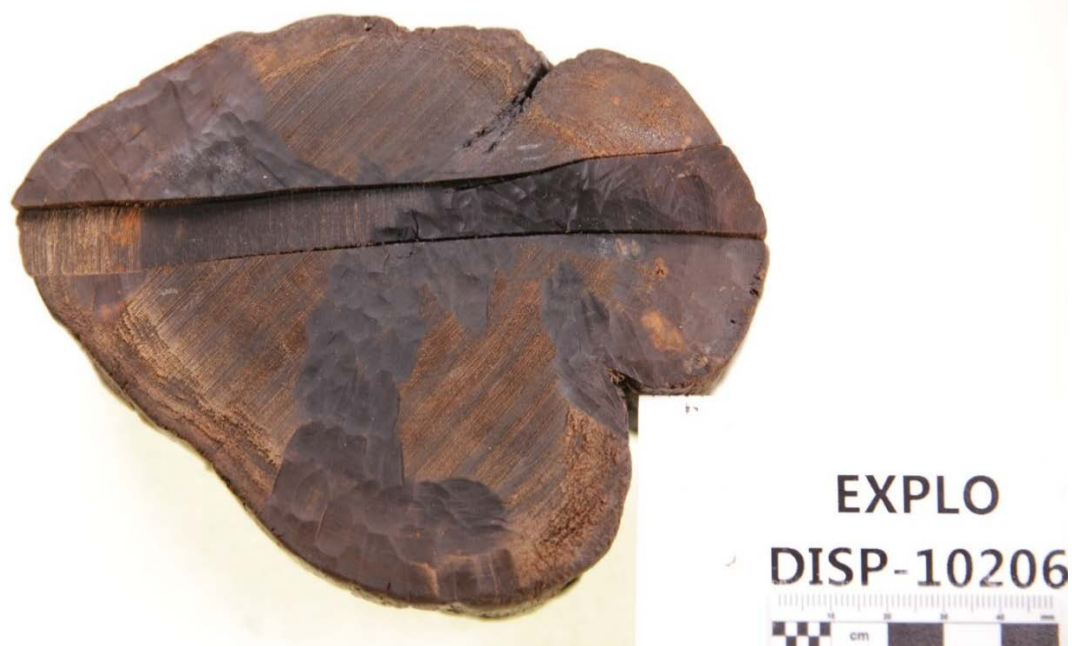

**Figure S2.1** Wood sample DISP-10206

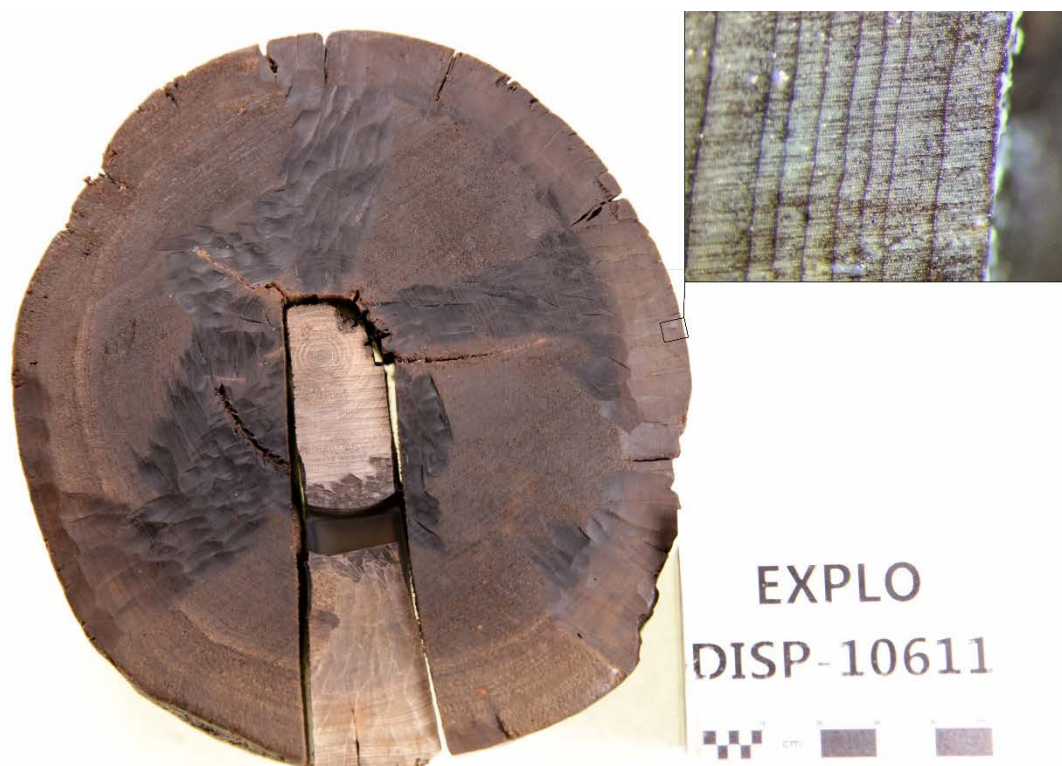

**Figure S2.2** Wood sample DISP-10611; inset: close-up of the samples' waxy-edge (last growth ring), tracheids filled with chalk to enhance contrast.

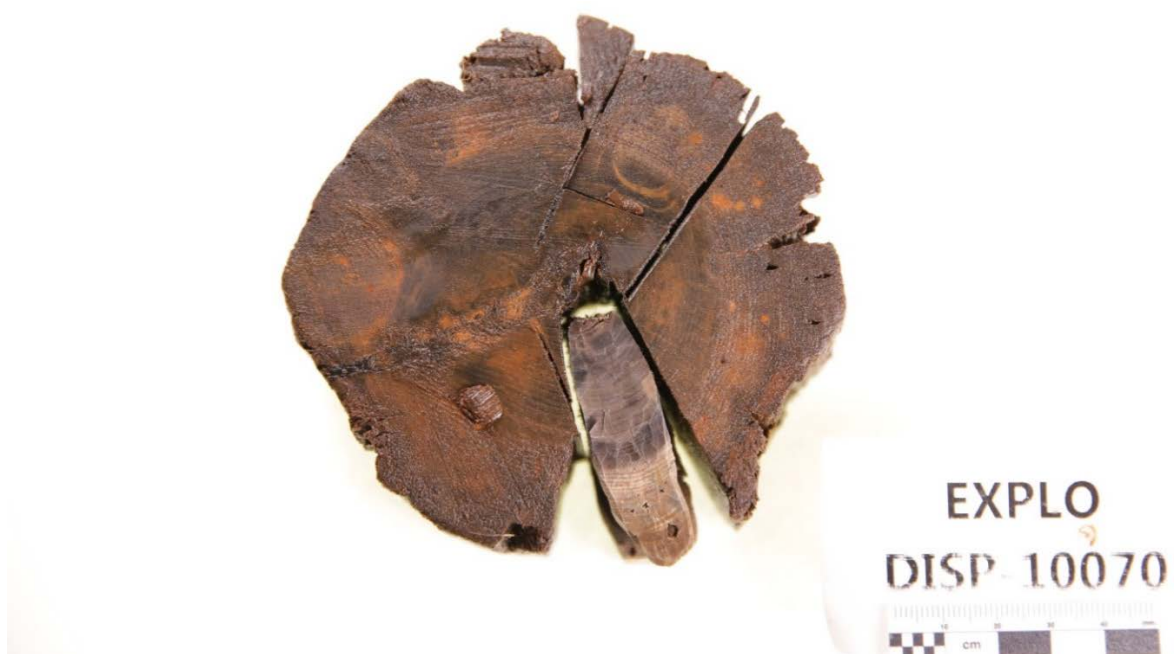

*Figure S2.3* Wood sample DISP-10070

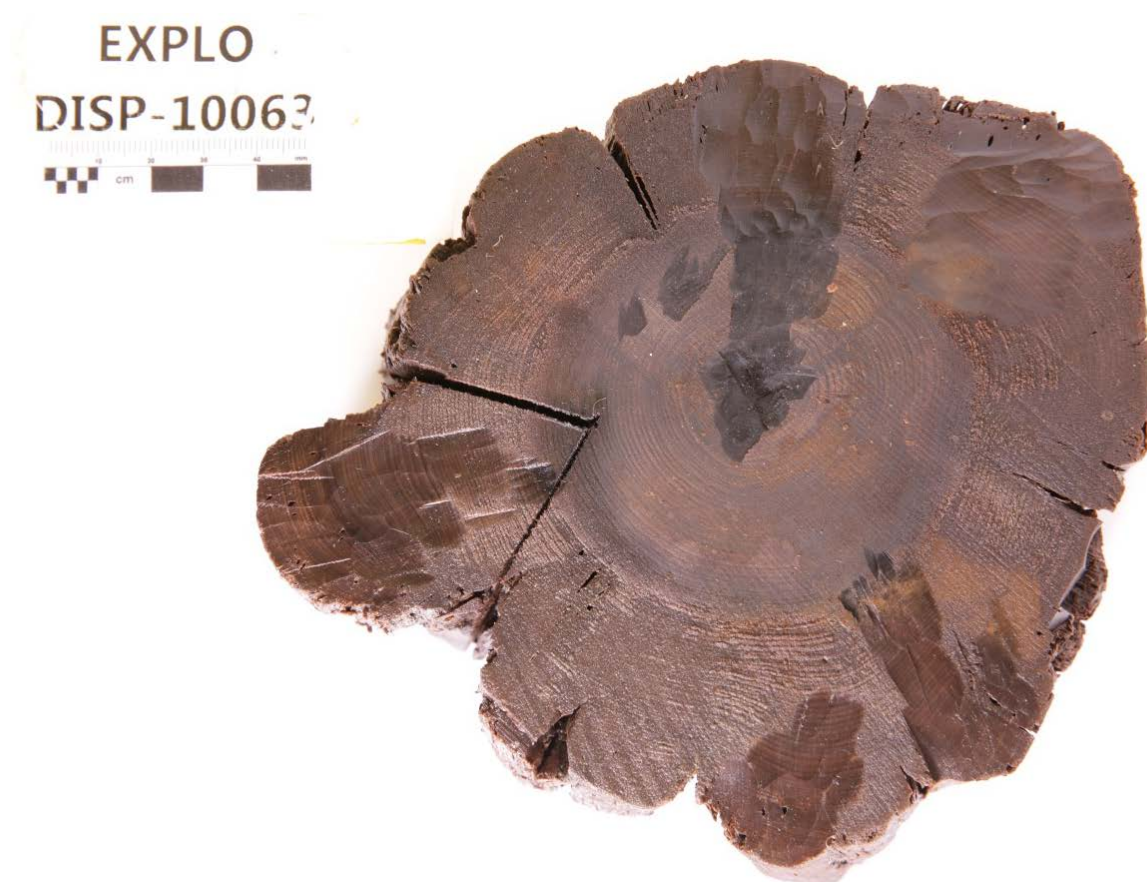

*Figure S2.4* Wood sample DISP-10063



a.

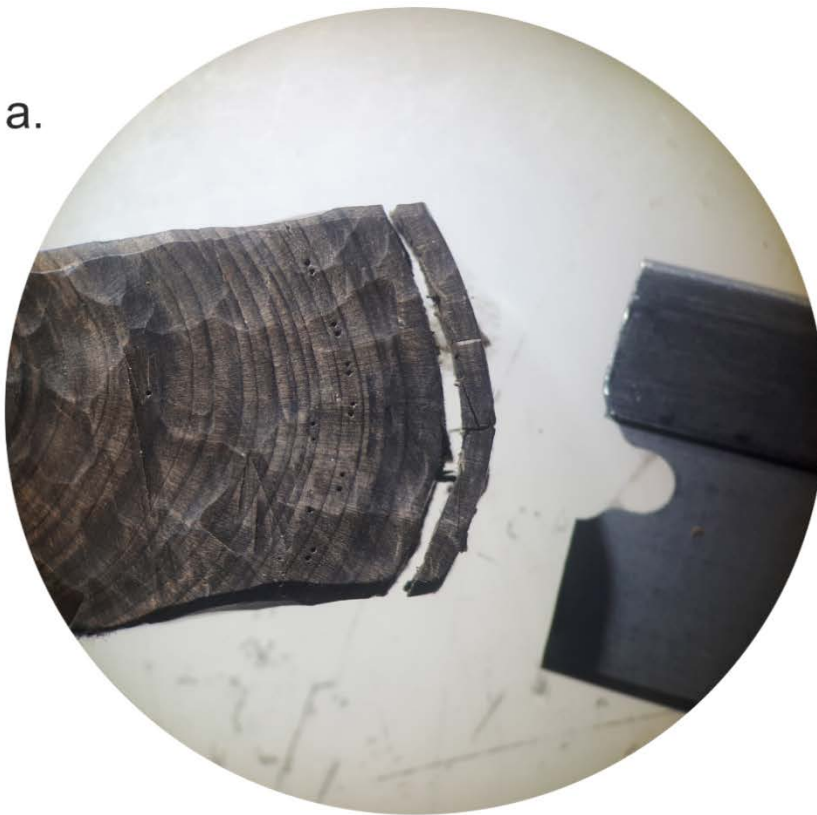

b.

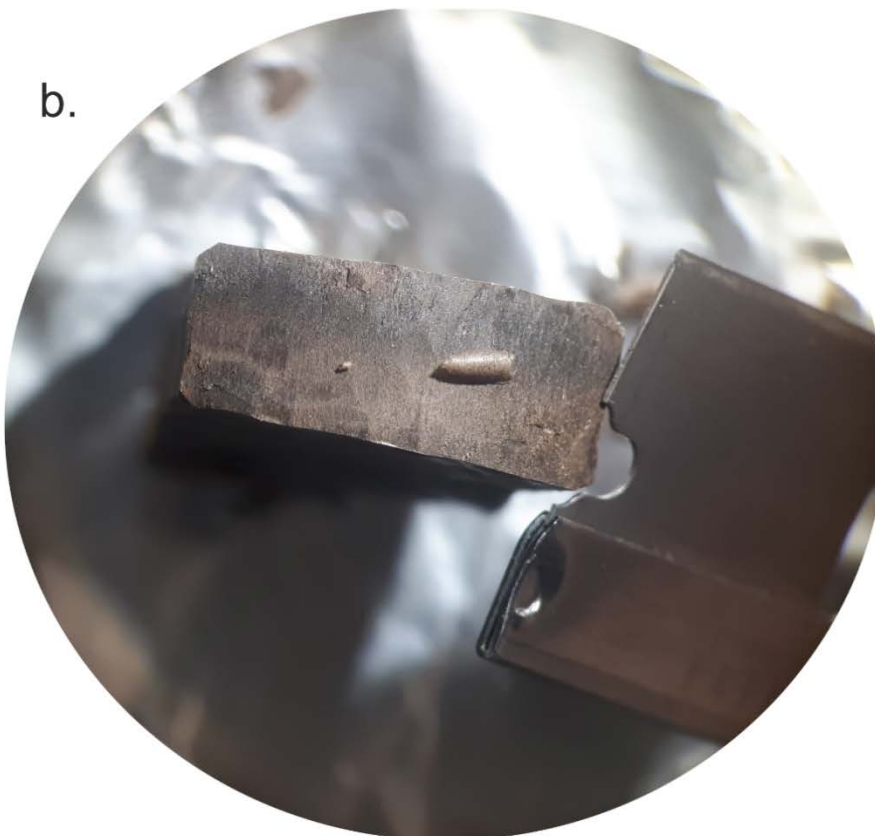

**Figure S2.5** Details from the ring sampling of DISP-10611: **a.**: sampling an individual ring. The “event ring” is ring number 19, located just below the ring 20 which is marked with a series of double pins; **b.**: scraping off last bits of earlywood, tangential view of the wood block in **a.**; width of razor side 1.8 cm.

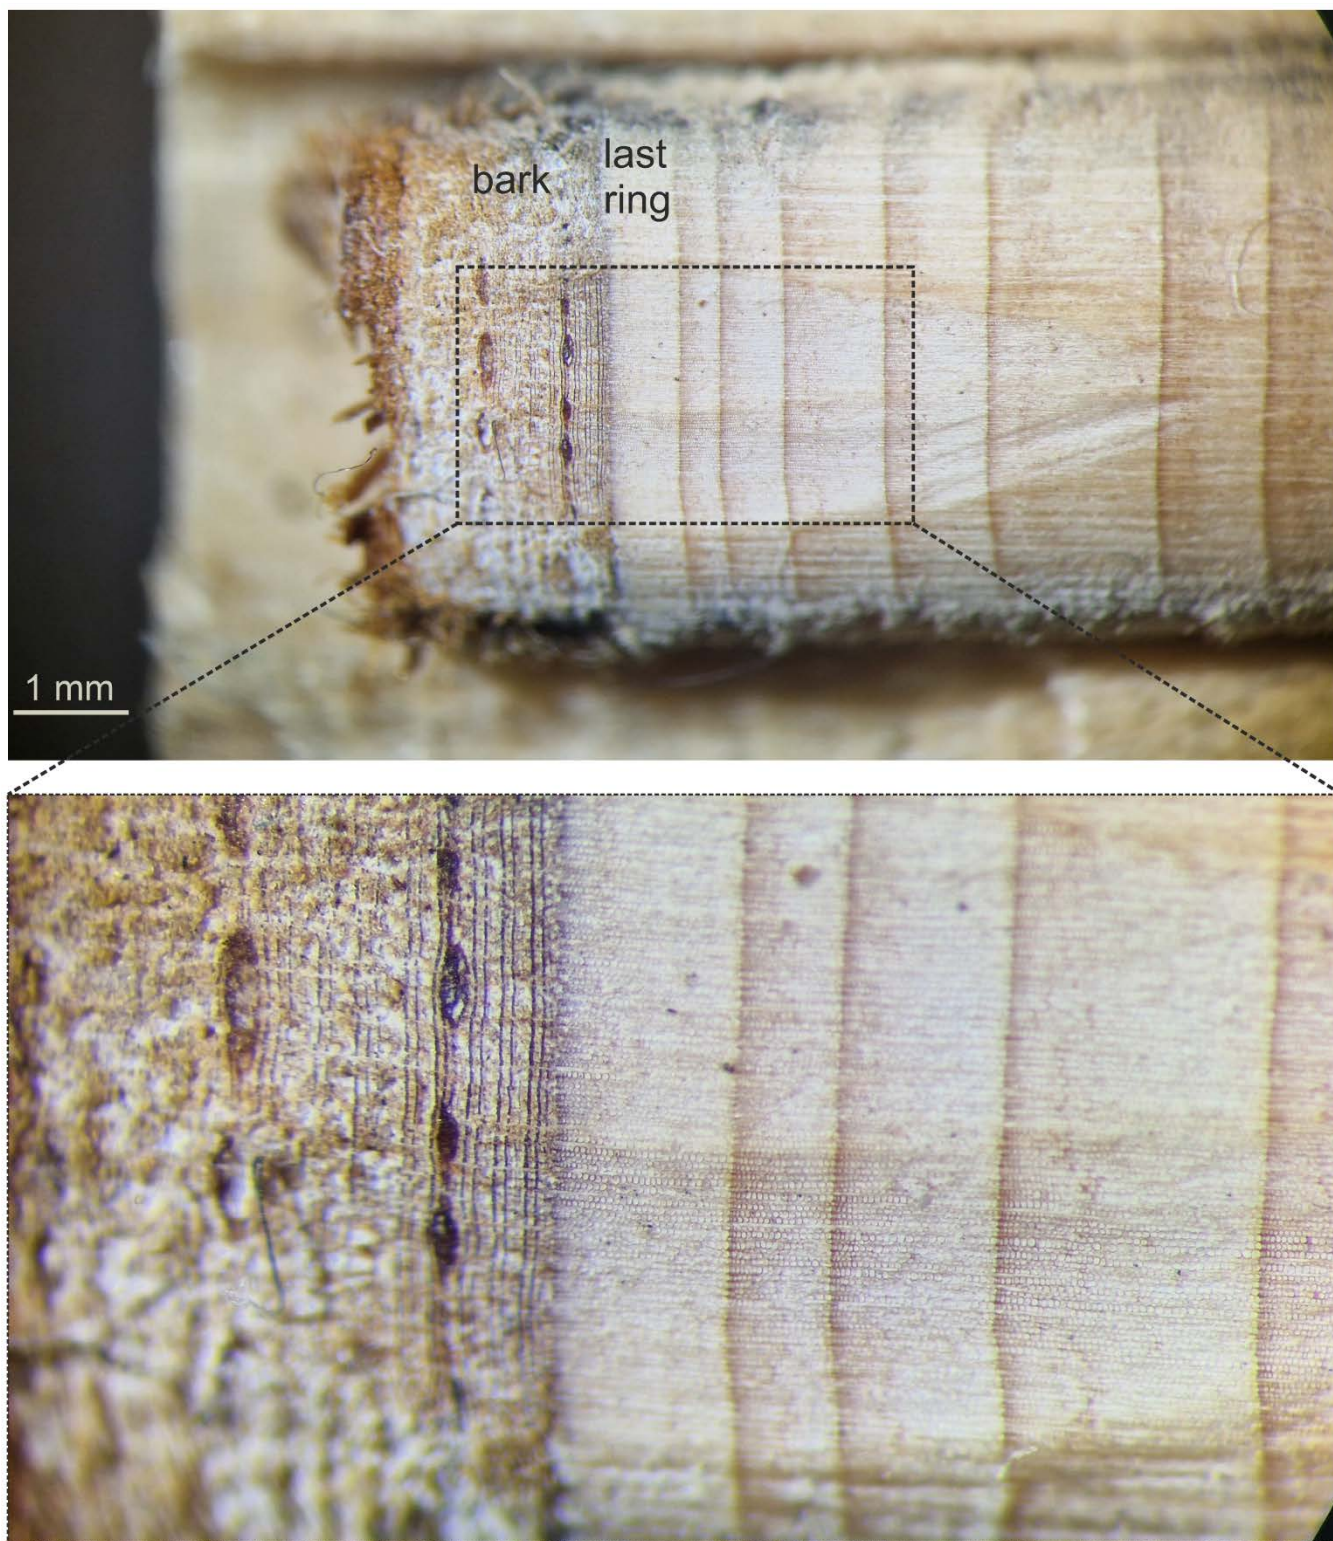

**Figure S2.6** Cross-section of a modern *Juniperus excelsa* from Mt. Galichica, ca. 60 km northwest of Dispilio. Latewood of last ring is almost fully developed, same as in the oaks in the area, indicating similar timing of ring formation. Core taken between 5-7 September 2021.



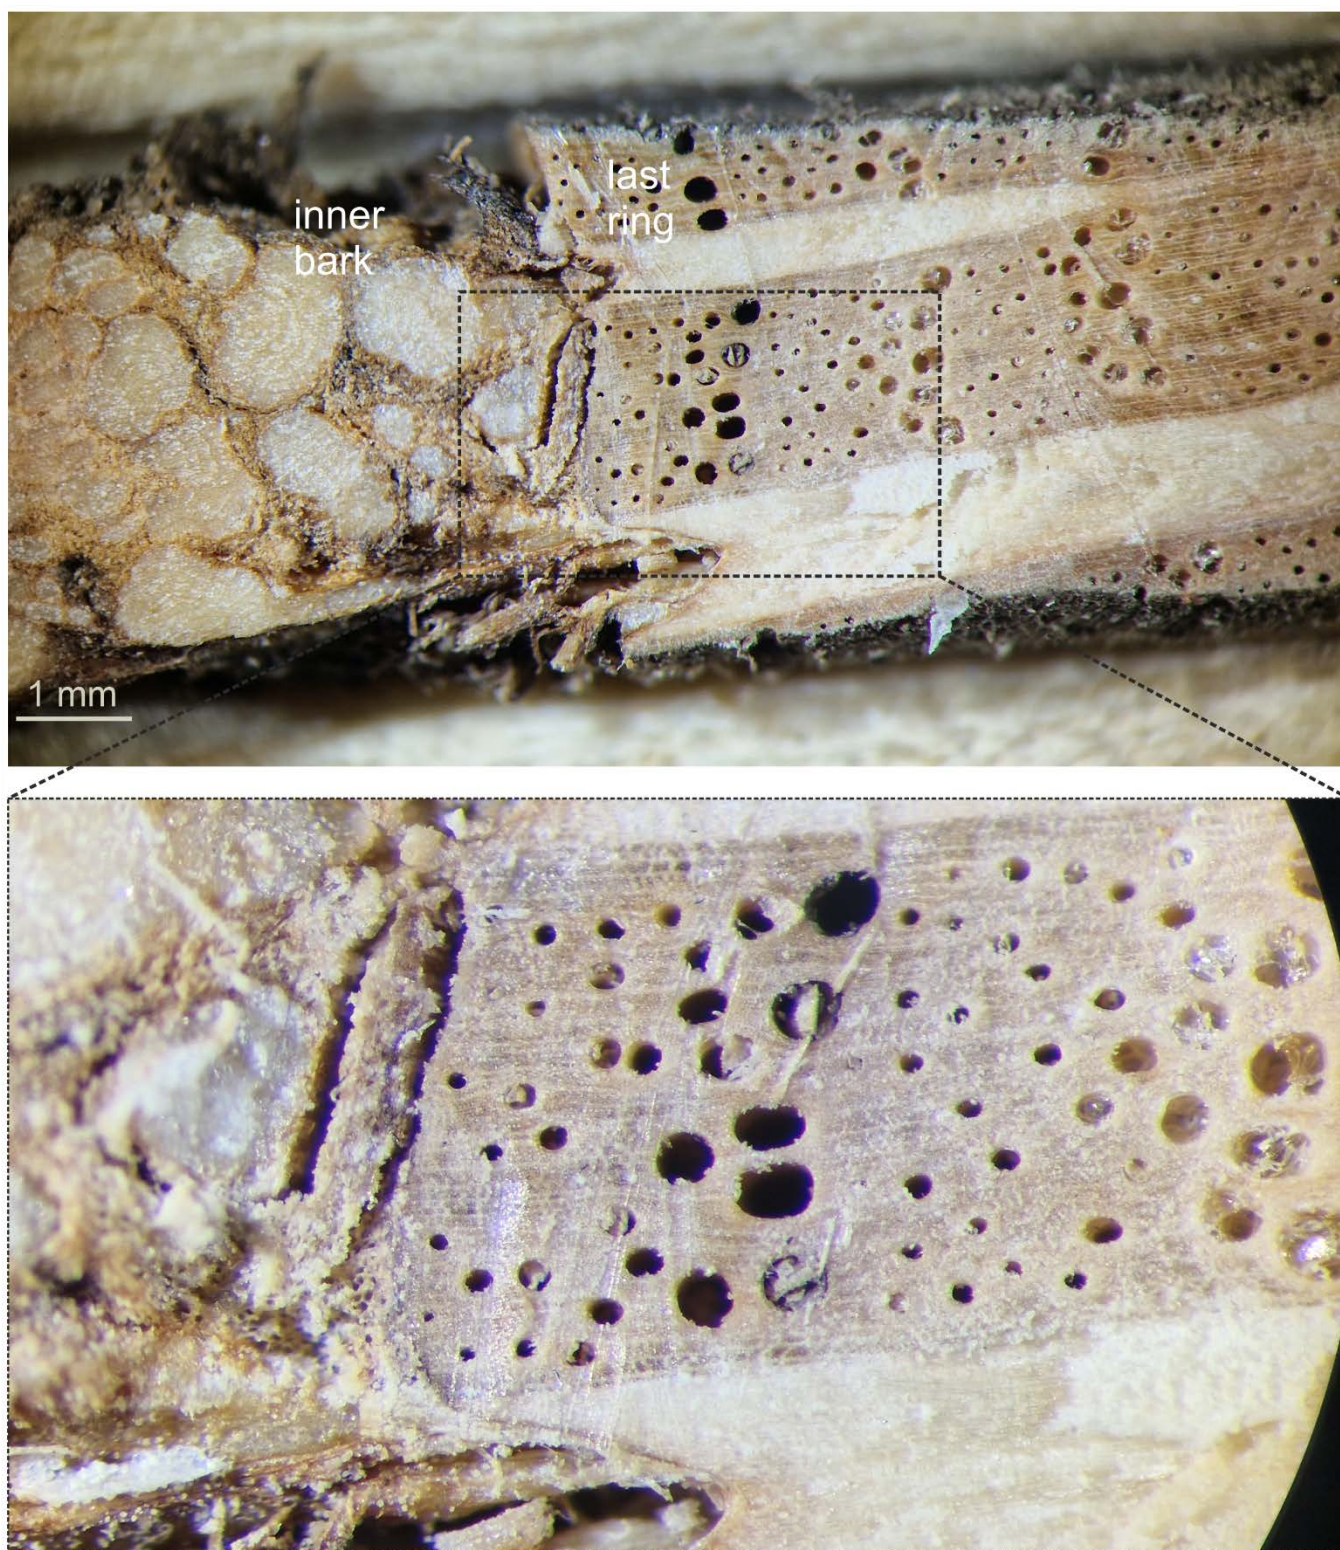

**Figure S2.7** Cross-section of a modern *Quercus trojana* from Mt. Galichica, ca. 60 km northwest of Dispilio. Latewood of last ring is fully developed, same as in junipers in the area, indicating similar timing of ring formation. Core taken between 5-7 September 2021.



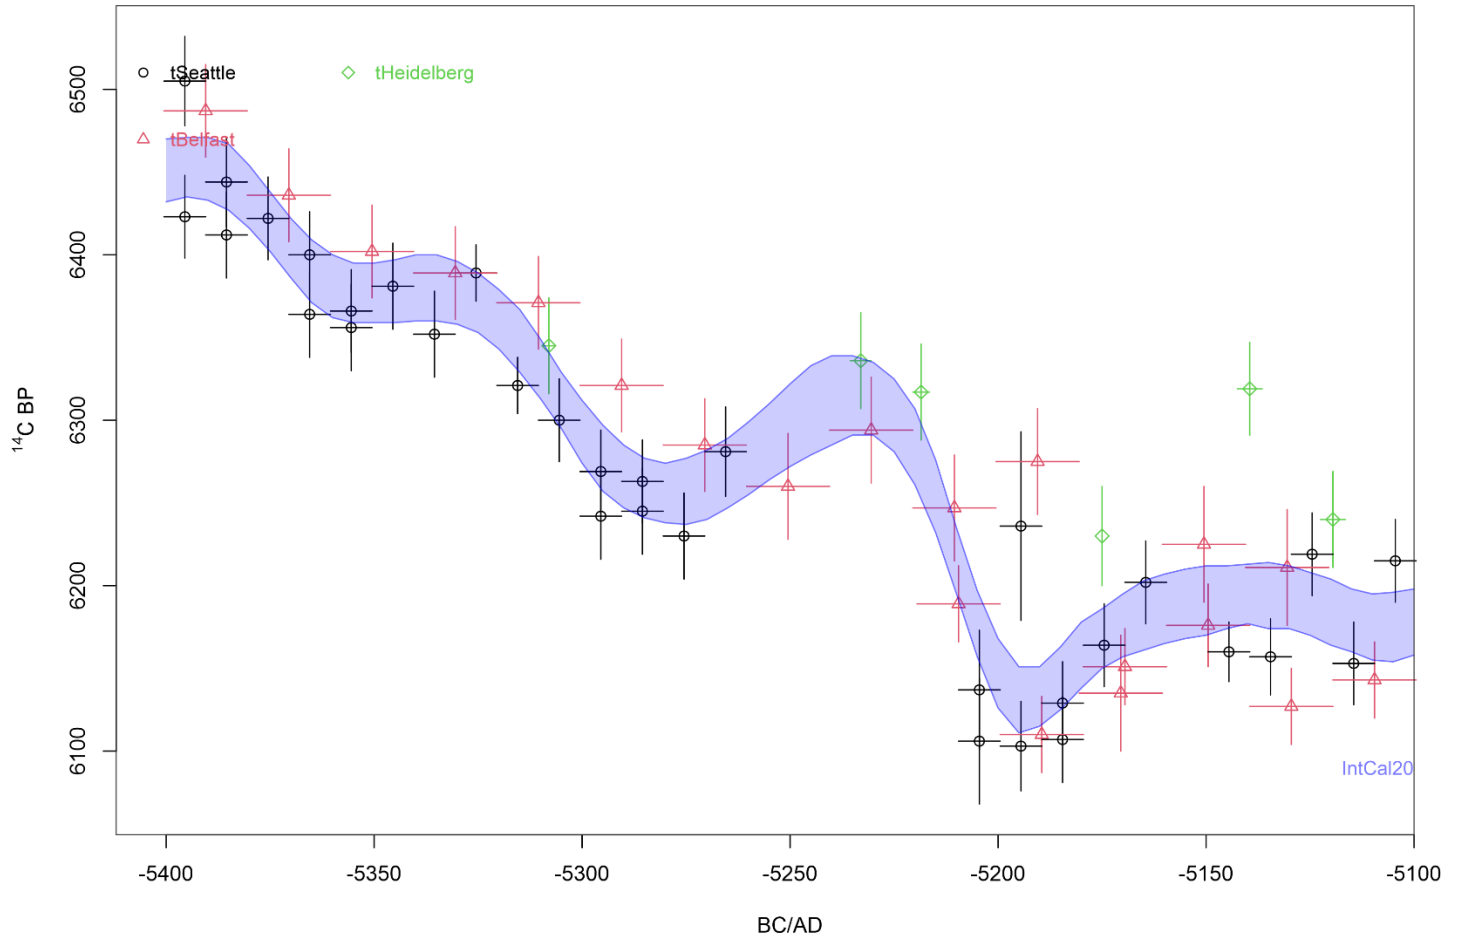

**Figure S2.8** Radiocarbon calibration curve IntCal20 (blue-shaded band) (Reimer et al., 2020) and individual data points that make up the curve for the period 5400-5100 BC. Vertical lines represent the measurement uncertainties, horizontal bars indicate the number of rings in the samples; in this period individual points of Belfast data represent 20-ring blocks, Seattle 10-ring blocks, and Heidelberg 4-5-ring blocks. Figure produced with the IntCal R package <sup>4</sup>.

## S3 – Supplementary information on measurements and data

### S3.1 Data handling at LARA 14C laboratory

Samples were measured using the LARA MICADAS AMS system. The tree-rings from wood samples DISP-10070, -10206 and a first run of -10611 were analysed in June – November 2022 together with three oxalic acid II (SRM 4990C, NIST) standards and three chemical blanks. In June 2023, DISP-10063 and a second run of -10611 were dated together with five oxalic acid II standards and four chemical blanks that were used for blank subtraction, standard normalization, and correction for isotope fractionations as well as two IAEA-C5, two IAEA-C7, two 1515 CE reference samples and two cellulose blanks as secondary standards and blanks, respectively. A total of ten samples from our first run of DISP-10611 were repeated within our second run which, gained an average negligible difference between both of our runs of 0.6‰ so that our DISP-10611 dataset that is shown Fig.3a represents the average of both LARA runs.

All initial results (Supplementary Table S1) were biased by an inappropriate batch of the oxalic acid II standard that was used for the measurements. By intercomparison with three other oxalic acid II batches (one of which was provided by ETHZ), an offset corresponding to a  $^{14}\text{C}$  age of  $+30.9 \pm 3.2$  yr was determined for the inappropriate batch, whereas the results of the oxalic acid II of the other three batches were identical within uncertainties. The initial results were corrected for this offset yielding a shift of  $\sim +4.2\text{‰}$  for the samples. The final (i.e. corrected) results are presented in Fig. 3a in the main article text.

### S3.2 Note on 1 year correction of the Methuselah Walk Bristlecone Pine Chronology

Brehm et al., (2022) showed that the bristlecone pine  $^{14}\text{C}$  data preceded the  $^{14}\text{C}$  jump at 5259 BCE by 1 year relative to the other tree species used. At the time of publication, the authors had ruled out a dissection or labeling error. The remaining three explanations were that, 1; the rings, although correctly dissected may have been too narrow to achieve a full and perfect separation, 2; the response was caused due to a combination of the timing of the SEP event and the growth season of the tree, or 3; there was a dating error within the bristlecone master chronology.

Matthew Salzer and Christopher Baisan conducted extensive testing of the portion of the master bristlecone pine chronology from which samples used in the study were taken. As reported in Brehm et al 2022, the statistics of the sample to the master chronology were excellent (correlation;  $r = 0.770$ ), however Salzer and Baisan had previously discovered that two changes were required to the older portion of the record which could not be cross-checked against an independent sequence at a different growth location. A correction of 2 years was applied to Wes Ferguson's original 1966 CE dating of this part of the MWK chronology due to

an observation by Lamarche and Harlan in 1973 that Ferguson had incorrectly added what he thought were two likely missing rings to his chronology in -2141 and -2680. They suspected that something similar may have happened for the portion of the record between -2680 and -5075 (i.e. impacting the master but not the sample used in the study) as one wrongly inserted ring in this period would explain the off-set observed while still resulting in the strong statistical correlation for the sample. Checking this required physically checking a large number of samples and handwritten records from the 1970s and 1980s which used the skeleton plot method. This work is approaching completion and a candidate error has been identified and confirmed. The results will be published formally, however for the purpose of display in this study there is more than sufficient justification to now display the data in their correct position, especially as this does not impact the main conclusions of this study.

### S3.3 Tree-ring width measurements in Heidelberg format (.fh)

HEADER:

Keycode=10611.0

DateEnd=-5155

QualityCode=a

Species=JUSP

Length=123

SapWoodRings=44

Pith=p

WaldKante=3

Location=GRC/Kastoria Dispilio 2019

PersId=

ExcavNr=

CreationDate= 20210107

Dated=dated

DATA:Tree

|     |    |     |     |     |     |     |     |     |    |
|-----|----|-----|-----|-----|-----|-----|-----|-----|----|
| 30  | 65 | 74  | 88  | 102 | 95  | 117 | 171 | 108 | 94 |
| 121 | 58 | 77  | 55  | 75  | 63  | 47  | 46  | 79  | 80 |
| 92  | 78 | 111 | 129 | 69  | 46  | 40  | 52  | 61  | 38 |
| 31  | 42 | 35  | 16  | 18  | 36  | 44  | 37  | 23  | 50 |
| 60  | 67 | 90  | 105 | 88  | 112 | 92  | 78  | 62  | 71 |



|    |    |    |    |    |    |    |    |    |    |
|----|----|----|----|----|----|----|----|----|----|
| 76 | 52 | 59 | 96 | 45 | 70 | 71 | 54 | 43 | 67 |
| 64 | 71 | 68 | 78 | 71 | 54 | 69 | 42 | 42 | 43 |
| 58 | 57 | 42 | 48 | 43 | 49 | 77 | 36 | 30 | 42 |
| 18 | 21 | 17 | 21 | 22 | 23 | 26 | 22 | 24 | 29 |
| 42 | 47 | 29 | 21 | 17 | 17 | 33 | 38 | 27 | 16 |
| 36 | 44 | 38 | 21 | 14 | 26 | 18 | 10 | 32 | 33 |
| 24 | 46 | 48 | 46 | 39 | 41 | 20 | 17 | 31 | 23 |
| 20 | 43 | 53 |    |    |    |    |    |    |    |

HEADER:

Keycode=10206.0

DateEnd=-5153

QualityCode=a

Species=JUSP

Length=142

SapWoodRings=55

Pith=p

WaldKante=3

Location=GRC/Kastoria Dispilio 2019

PersId=

ExcavNr=.

CreationDate= 20210928

Dated=dated

DATA:Tree

|    |    |    |    |    |    |     |     |     |     |
|----|----|----|----|----|----|-----|-----|-----|-----|
| 66 | 65 | 55 | 54 | 69 | 77 | 106 | 100 | 106 | 101 |
| 47 | 54 | 15 | 23 | 33 | 41 | 39  | 64  | 68  | 52  |
| 73 | 58 | 48 | 51 | 57 | 50 | 36  | 41  | 31  | 40  |
| 39 | 53 | 52 | 50 | 43 | 41 | 44  | 42  | 28  | 34  |
| 52 | 34 | 43 | 25 | 37 | 46 | 43  | 60  | 66  | 52  |
| 38 | 50 | 52 | 51 | 46 | 32 | 50  | 56  | 49  | 58  |
| 66 | 64 | 56 | 52 | 46 | 42 | 44  | 41  | 38  | 51  |
| 36 | 34 | 47 | 54 | 46 | 40 | 32  | 38  | 39  | 48  |

|    |    |    |    |    |    |    |    |    |    |
|----|----|----|----|----|----|----|----|----|----|
| 40 | 53 | 56 | 48 | 34 | 30 | 28 | 44 | 45 | 56 |
| 56 | 53 | 60 | 69 | 50 | 26 | 14 | 15 | 28 | 37 |
| 36 | 40 | 28 | 43 | 23 | 23 | 35 | 37 | 45 | 22 |
| 17 | 21 | 26 | 27 | 51 | 21 | 20 | 50 | 67 | 91 |
| 55 | 31 | 48 | 35 | 17 | 29 | 31 | 29 | 42 | 56 |
| 61 | 61 | 66 | 47 | 41 | 42 | 42 | 31 | 55 | 66 |
| 38 | 48 |    |    |    |    |    |    |    |    |

HEADER:

Keycode=10070.0

DateEnd=-5240

QualityCode=a

Species=JUSP

Length=58

SapWoodRings=36

Pith=p

WaldKante=3

Location=GRC/Kastoria Dispilio 2019

PersId=

ExcavNr=

CreationDate= 20210928

Dated=dated

DATA:Tree

|     |     |     |     |     |     |     |     |     |     |
|-----|-----|-----|-----|-----|-----|-----|-----|-----|-----|
| 141 | 176 | 146 | 136 | 140 | 106 | 125 | 156 | 152 | 111 |
| 120 | 131 | 126 | 91  | 114 | 86  | 85  | 66  | 73  | 58  |
| 144 | 97  | 50  | 87  | 89  | 96  | 80  | 90  | 88  | 59  |
| 74  | 59  | 69  | 63  | 71  | 60  | 63  | 50  | 43  | 55  |
| 69  | 40  | 61  | 85  | 50  | 55  | 45  | 74  | 75  | 48  |
| 73  | 78  | 67  | 54  | 57  | 68  | 54  | 62  |     |     |

HEADER:

Keycode=10063.0

DateEnd=-5240

QualityCode=a

Species=JUSP

Length=125

SapWoodRings=81

Pith=p

WaldKante=3

Location=GRC/Kastoria Dispilio 2019

PersId=

ExcavNr=

CreationDate= 20210928

Dated=dated

DATA:Tree

|     |    |    |     |     |     |     |     |     |     |
|-----|----|----|-----|-----|-----|-----|-----|-----|-----|
| 90  | 91 | 48 | 102 | 91  | 97  | 61  | 62  | 46  | 62  |
| 82  | 77 | 91 | 84  | 76  | 60  | 103 | 123 | 97  | 53  |
| 61  | 70 | 68 | 103 | 80  | 93  | 88  | 116 | 106 | 101 |
| 112 | 97 | 66 | 94  | 95  | 144 | 103 | 57  | 70  | 69  |
| 58  | 80 | 71 | 67  | 86  | 65  | 80  | 72  | 70  | 75  |
| 51  | 33 | 73 | 84  | 82  | 57  | 91  | 62  | 76  | 72  |
| 66  | 59 | 69 | 83  | 101 | 76  | 79  | 68  | 88  | 65  |
| 96  | 75 | 91 | 88  | 118 | 142 | 107 | 89  | 61  | 74  |
| 25  | 39 | 23 | 20  | 26  | 31  | 31  | 97  | 66  | 52  |
| 83  | 69 | 84 | 77  | 95  | 76  | 44  | 74  | 59  | 63  |
| 43  | 46 | 35 | 39  | 28  | 57  | 44  | 56  | 25  | 46  |
| 52  | 35 | 41 | 35  | 66  | 47  | 37  | 50  | 56  | 59  |
| 63  | 46 | 60 | 69  | 49  |     |     |     |     |     |



## Supplementary Material References

1. Ramsey, C. B. Bayesian analysis of radiocarbon dates. *Radiocarbon* **51**, 337–360 (2009).
2. Reimer, P. J. *et al.* The IntCal20 Northern Hemisphere radiocarbon age calibration curve (0–55 cal kBP). *Radiocarbon* **62**, 725–757 (2020).
3. Brehm, N. *et al.* Tree-rings reveal two strong solar proton events in 7176 and 5259 BCE. *Nat. Commun.* **13**, 1–8 (2022).
4. Blaauw, M. IntCal: Radiocarbon Calibration Curves. R package version 0.3.1. <https://CRAN.R-project.org/package=IntCal>. (2022).
